# Supplementary material for: O-GlcNAcylation confers protection againstStaphylococcus aureusinfection inCaenorhabditis elegansthrough ubiquitination
Source: Royal Society of Chemistry journal article supplement (doi:10.1039/c8ra00279g), 2018-01-01
Supplement: c8ra00279g1.pdf [file c8ra00279g1.pdf]

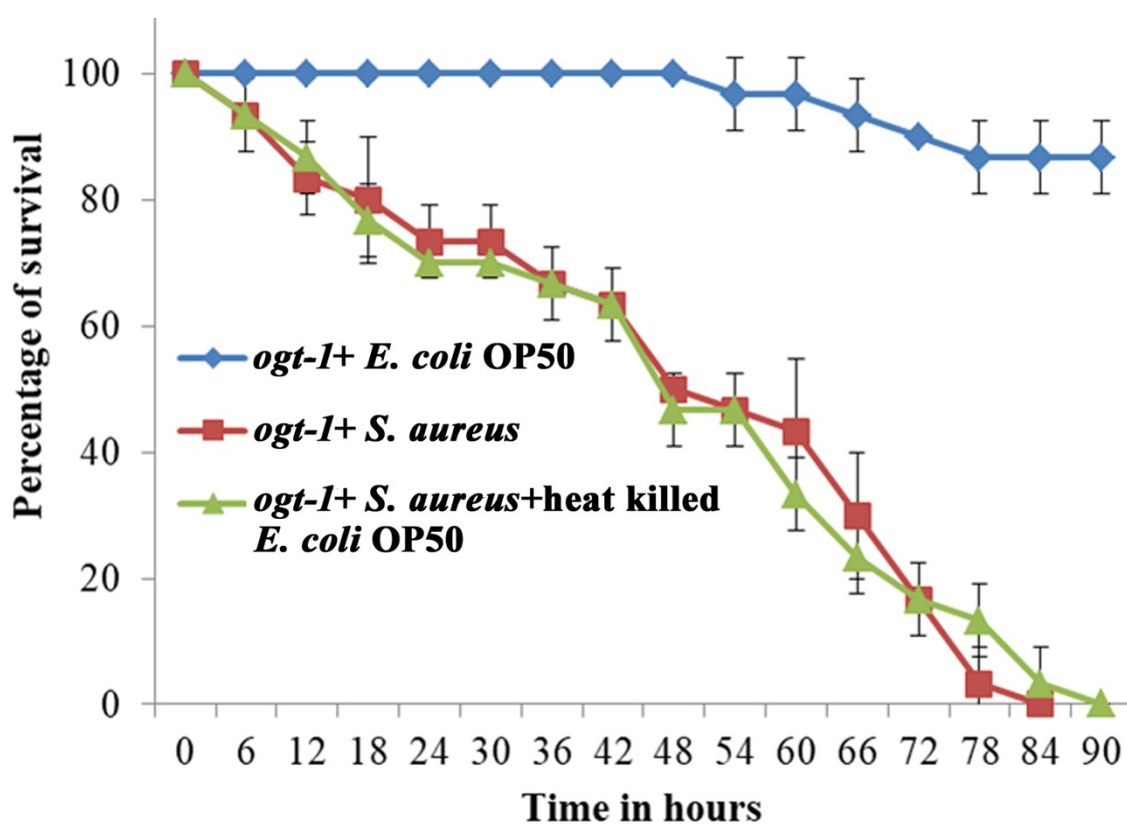

**Supplementary Figure 1:** Effect of *S. aureus* infection on the survival of *ogt-1* in the presence of heat killed *E. coli* OP50. Error bars represent standard deviations from the mean (N=3).
